# Supplementary material
Source: publisher figshare collection journal article supplement (https://diabetesjournals.figshare.com/articles/dataset/_/17268527)
Supplement: Supplementary file 1 [file 1]

## **Hong Kong Diabetes Register TRS Study Group Members**

Ronald C.W. Ma<sup>1,2,3,4</sup>

Juliana C.N. Chan<sup>1,2,3</sup>

Yu Huang<sup>5</sup>

Hui-yao Lan<sup>1, 3</sup>

Si Lok<sup>3</sup>

Brian Tomlinson<sup>1</sup>

Stephen K.W. Tsui<sup>5</sup>

Weichuan Yu<sup>6</sup>

Kevin Y.L. Yip<sup>7</sup>

Ting Fung Chan<sup>8</sup>

Xiaodan Fan<sup>9</sup>

Wing Yee So<sup>1,2</sup>

Cheuk Chun Szeto<sup>1</sup>

Nelson L.S. Tang<sup>3</sup>

Andrea O. Luk<sup>1,2,3</sup>

Xiaoyu Tian<sup>5</sup>

Guozhi Jiang<sup>1</sup>

Claudia H.T. Tam<sup>1</sup>

Heung Man Lee<sup>1</sup>

Cadmon K.P. Lim<sup>1</sup>

Katie K.H. Chan<sup>2</sup>

Fangying Xie<sup>1</sup>

Alex C.W. Ng<sup>1</sup>

Grace P.Y. Cheung<sup>1</sup>

Ming-wai Yeung<sup>1</sup>

Shi Mai<sup>5</sup>

Fei Xie<sup>1</sup>

Sen Zhang<sup>6</sup>

Pu Yu<sup>6</sup>

Meng Weng<sup>6</sup>

---

## Affiliations

---

<sup>1</sup>Department of Medicine and Therapeutics, The Chinese University of Hong Kong, Hong Kong

<sup>2</sup>Hong Kong Institute of Diabetes and Obesity, The Chinese University of Hong Kong, Hong Kong

<sup>3</sup>Li Ka Shing Institute of Health Sciences, The Chinese University of Hong Kong, Hong Kong

<sup>4</sup>Integrated Bioinformatics Laboratory for Cancer Biology and Metabolic Diseases, The Chinese University of Hong Kong, Hong Kong

<sup>5</sup>School of Biomedical Sciences, The Chinese University of Hong Kong

<sup>6</sup>Department of Electronic and Computer Engineering, The Hong Kong University of Science and Technology

<sup>7</sup> Department of Computer Science and Engineering, The Chinese University of Hong Kong

<sup>8</sup> School of Life Sciences, The Chinese University of Hong Kong

<sup>9</sup> Department of Statistics, The Chinese University of Hong Kong, Hong Kong

### **Hong Kong Diabetes Biobank Study Group Members**

Ronald C.W. Ma <sup>1,2,3,4</sup>

Juliana C.N. Chan <sup>1,2,3,4</sup>

Risa Ozaki<sup>1,2</sup>

Andrea O. Luk<sup>1,2,3,4</sup>

Wing Yee So<sup>1,2</sup>

Cadmon King Poo Lim <sup>1,3</sup>

Ka Fai Lee<sup>5</sup>

Shing Chung Siu<sup>6</sup>

Grace Hui <sup>7</sup>

Chiu Chi Tsang <sup>8</sup>

Kam Piu Lau<sup>9</sup>

Jenny Y.Y. Leung<sup>10</sup>

Man Wo Tsang<sup>11</sup>

Grace Kam<sup>11</sup>

Elaine Cheung<sup>11</sup>

Ip Tim Lau<sup>12</sup>

June Kam-yin Li<sup>13</sup>

Vincent TF Yeung<sup>14</sup>

Samuel KS Fung<sup>15</sup>

Stanley Lo<sup>16</sup>

Emmy Lau<sup>16</sup>

Yuk Lun Cheng<sup>17</sup>

Stephen Kwok-wing Tsui<sup>18</sup>

Yu Huang<sup>18</sup>

Hui-yao Lan<sup>1,3</sup>

Weichuan Yu<sup>19</sup>

Brian Tomlinson<sup>1</sup>

Si Lok<sup>20</sup>

Ting Fung Chan<sup>21</sup>

Kevin Yuk-lap Yip<sup>22</sup>

Cheuk Chun Szeto<sup>1,3</sup>

Xiaodan Fan<sup>23</sup>

Nelson LS Tang<sup>3, 24</sup>

Xiaoyu Tian<sup>18</sup>

Claudia H.T. Tam<sup>1,4</sup>

Guozhi Jiang<sup>1,4</sup>

Shi Mai<sup>18</sup>

Baoqi Fan<sup>1,2,4</sup>

Eric S Lau<sup>1</sup>

Fei Xie<sup>1</sup>

Sen Zhang<sup>19</sup>

Pu Yu<sup>19</sup>

Meng Wang<sup>19</sup>

Heung Man Lee<sup>1</sup>

Fangying Xie<sup>1</sup>

Alex C.W. Ng<sup>1,4</sup>

Grace Cheung<sup>1</sup>

Alice PS Kong<sup>1,2</sup>

Elaine Y.K. Chow<sup>1,2</sup>

Ming Wai Yeung<sup>1</sup>

Chun Chung Chow<sup>1</sup>

Kitty K.T. Cheung<sup>1</sup>

Rebecca Y.M. Wong<sup>1</sup>

So Hon Cheong<sup>18</sup>

Katie KH Chan<sup>1,2</sup>

Chin-san Law<sup>12</sup>

Anthea Ka Yuen Lock<sup>12</sup>

Ingrid Kwok Ying Tsang<sup>12</sup>

Susanna Chi Pun Chan<sup>12</sup>

Yin Wah Chan<sup>12</sup>

Cherry Chiu<sup>2</sup>

Chi Sang Hung<sup>11</sup>

Cheuk Wah Ho<sup>11</sup>

Ivy Hoi Yee Ng<sup>11</sup>

Juliana Mun Chun Fok<sup>6</sup>

Kai Man Lee<sup>6</sup>

Hoi Sze Candy Leung<sup>14</sup>

Ka Wah Lee<sup>13</sup>

Hui Ming Chan<sup>13</sup>

Winnie Wat<sup>16</sup>

Tracy Lau<sup>16</sup>

Rebecca Law<sup>15</sup>

Ryan Chan<sup>15</sup>

Candice Lau<sup>1</sup>

Pearl Tsang<sup>1</sup>

Vince Chan<sup>1</sup>

Lap Ying Ho<sup>1</sup>

Eva Wong<sup>1</sup>

Josephine Chan<sup>1</sup>

Sau Fung Lam<sup>1</sup>

Jessy Pang<sup>1</sup>

Yee Mui Lee<sup>1</sup>

<sup>1</sup> Department of Medicine and Therapeutics, The Chinese University of Hong Kong

<sup>2</sup> Hong Kong Institute of Diabetes and Obesity, The Chinese University of Hong Kong

<sup>3</sup> Li Ka Shing Institute of Health Sciences, The Chinese University of Hong Kong

<sup>4</sup> Chinese University of Hong Kong-Shanghai Jiao Tong University Joint Research Centre in Diabetes Genomics and Precision Medicine

<sup>5</sup> School of Biomedical Sciences, The Chinese University of Hong Kong

<sup>5</sup> Department of Electronic and Computer Engineering, Hong Kong University of Science and Technology

<sup>6</sup> Department of Medicine and Geriatrics, Kwong Wah Hospital

<sup>7</sup> Diabetes Centre, Tung Wah Eastern Hospital, Hong Kong

<sup>8</sup> Diabetes and Education Centre, Alice Ho Miu Ling Nethersole Hospital, Hong Kong

<sup>9</sup> North District Hospital, Hong Kong

<sup>10</sup> Department of Integrated Medical Service, Ruttonjee Hospital, Hong Kong

<sup>11</sup> Diabetes Ambulatory Care Centre, Department of Medicine and Geriatrics, United Christian Hospital

<sup>12</sup> Tseung Kwan O Hospital, Hong Kong



<sup>13</sup> Department of Medicine, Yan Chai Hospital, Hong Kong

<sup>14</sup> Centre for Diabetes Education and Management, Our Lady of Maryknoll Hospital, Hong Kong

<sup>15</sup> Department of Medicine and Geriatrics, Princess Margaret Hospital, Hong Kong

<sup>16</sup> Department of Medicine, Pamela Youde Nethersole Eastern Hospital, Hong Kong.

<sup>17</sup> Department of Medicine, Alice Ho Miu Ling Nethersole Hospital, Hong Kong

<sup>18</sup> The Centre for Applied Genomics, The Hospital for Sick Children, Toronto, Canada

<sup>19</sup> School of Life Sciences, The Chinese University of Hong Kong

<sup>20</sup> Department of Computer Science and Engineering, The Chinese University of Hong Kong

<sup>21</sup> Department of Statistics, The Chinese University of Hong Kong

<sup>22</sup> Department of Chemical Pathology, The Chinese University of Hong Kong

<sup>23</sup> CUHK-SJTU Joint Research Centre on Diabetes Genomics and Precision Medicine

<sup>24</sup> Integrated Bioinformatics Laboratory for Cancer and Metabolic Diseases, The Chinese

University of Hong Kong
