# Supplementary material
Source: publisher figshare collection journal article supplement (https://diabetesjournals.figshare.com/articles/dataset/_/17268527)
Supplement: Supplementary file 2 [file 1]

Table S1 Association of 27 SNPs with serum uric acid in the discovery cohort of HKDR

| No. | SNP        | CHR | BP        | Nearest Gene | genotyped/<br>imputed | imputation<br>quality<br>(R-square) | MAF   | Risk/<br>non-<br>Risk<br>Allele | Model 1<br>(non-adjustment) |                        | Model 2<br>(adjustment) |                        |
|-----|------------|-----|-----------|--------------|-----------------------|-------------------------------------|-------|---------------------------------|-----------------------------|------------------------|-------------------------|------------------------|
|     |            |     |           |              |                       |                                     |       |                                 | Beta(SE)                    | P                      | Beta(SE)                | P                      |
| 1   | rs1471633  | 1   | 145723739 | PDZK1        | Imputed               | 0.992                               | 0.191 | A/C                             | 0.003(0.003)                | 0.314                  | -0.003(0.003)           | 0.308                  |
| 2   | rs1260326  | 2   | 27730940  | GCKR         | Genotyped             | 1.000                               | 0.458 | T/C                             | 0.009(0.002)                | 8.50×10 <sup>-5</sup>  | 0.007(0.002)            | 0.003                  |
| 3   | rs12498742 | 4   | 9944052   | SLC2A9       | Imputed               | 0.991                               | 0.017 | A/G                             | 0.017(0.01)                 | 0.082                  | 0.017(0.009)            | 0.073                  |
| 4   | rs2231142  | 4   | 89052323  | ABCG2        | Genotyped             | 1.000                               | 0.314 | T/G                             | 0.02(0.003)                 | 5.57×10 <sup>-15</sup> | 0.018(0.002)            | 4.45×10 <sup>-13</sup> |
| 5   | rs675209   | 6   | 7102084   | RREB1        | Genotyped             | 1.000                               | 0.071 | T/C                             | -0.005(0.005)               | 0.274                  | -0.003(0.004)           | 0.545                  |
| 6   | rs1165151  | 6   | 25821616  | SLC17A1      | Imputed               | 0.997                               | 0.159 | G/T                             | 0.001(0.003)                | 0.667                  | 0.003(0.003)            | 0.334                  |
| 7   | rs2078267  | 11  | 64334114  | SLC22A11     | Genotyped             | 1.000                               | 0.019 | C/T                             | 0.004(0.009)                | 0.662                  | 0.006(0.008)            | 0.488                  |
| 8   | rs478607   | 11  | 64478063  | NRXN2        | Imputed               | 0.986                               | 0.178 | G/A                             | 0.004(0.003)                | 0.240                  | 0.004(0.003)            | 0.179                  |
| 9   | rs3741414  | 12  | 57844049  | INHBC        | Genotyped             | 1.000                               | 0.066 | C/T                             | 0.002(0.005)                | 0.656                  | 0.004(0.005)            | 0.327                  |
| 10  | rs11264341 | 1   | 155151493 | TRIM46       | Genotyped             | 1.000                               | 0.311 | C/T                             | 0.006(0.003)                | 0.016                  | 0.007(0.002)            | 0.003                  |
| 11  | rs17050272 | 2   | 121306440 | INHBB        | Genotyped             | 1.000                               | 0.458 | A/G                             | -0.001(0.002)               | 0.777                  | -0.001(0.002)           | 0.764                  |
| 12  | rs2307394  | 2   | 148716428 | ORC4L        | Genotyped             | 1.000                               | 0.474 | C/T                             | -0.003(0.002)               | 0.235                  | -0.003(0.002)           | 0.160                  |
| 13  | rs6770152  | 3   | 53100214  | SFMBT1       | Genotyped             | 1.000                               | 0.349 | G/T                             | 0.005(0.002)                | 0.028                  | 0.008(0.002)            | 0.001                  |
| 14  | rs17632159 | 5   | 72431482  | TMEM171      | Imputed               | 0.972                               | 0.287 | G/C                             | -0.003(0.003)               | 0.302                  | -0.001(0.003)           | 0.628                  |
| 15  | rs729761   | 6   | 43804571  | VEGFA        | Imputed               | 0.972                               | 0.132 | G/T                             | 0.003(0.003)                | 0.382                  | -0.001(0.003)           | 0.875                  |
| 16  | rs1178977  | 7   | 72857049  | BAZ1B        | Genotyped             | 1.000                               | 0.081 | A/G                             | -0.001(0.004)               | 0.898                  | -0.001(0.004)           | 0.748                  |
| 17  | rs17786744 | 8   | 23777006  | STC1         | Imputed               | 0.995                               | 0.353 | G/A                             | 0.001(0.002)                | 0.797                  | 0.001(0.002)            | 0.803                  |
| 18  | rs2941484  | 8   | 76478768  | HNF4G        | Genotyped             | 1.000                               | 0.336 | T/C                             | 0.005(0.003)                | 0.047                  | 0.004(0.002)            | 0.113                  |
| 19  | rs10821905 | 10  | 52646093  | A1CF         | Genotyped             | 1.000                               | 0.037 | A/G                             | -0.014(0.006)               | 0.034                  | -0.008(0.006)           | 0.218                  |
| 20  | rs642803   | 11  | 65560620  | OVOL1        | Genotyped             | 1.000                               | 0.394 | C/T                             | 0.001(0.002)                | 0.687                  | -0.002(0.002)           | 0.426                  |

|    |           |    |          |        |           |       |       |     |                |       |               |       |
|----|-----------|----|----------|--------|-----------|-------|-------|-----|----------------|-------|---------------|-------|
| 21 | rs1394125 | 15 | 76158983 | UBE2Q2 | Genotyped | 1.000 | 0.078 | A/G | -0.005(0.004)  | 0.230 | -0.003(0.004) | 0.517 |
| 22 | rs6598541 | 15 | 99271135 | IGF1R  | Imputed   | 0.969 | 0.438 | A/G | 0.0004(0.002)  | 0.877 | 0.002(0.002)  | 0.310 |
| 23 | rs7193778 | 16 | 69563890 | NFAT5  | Imputed   | 0.979 | 0.042 | C/T | -0.007(0.006)  | 0.222 | -0.006(0.006) | 0.267 |
| 24 | rs7188445 | 16 | 79734987 | MAF    | Imputed   | 0.983 | 0.289 | G/A | 0.006(0.003)   | 0.025 | 0.005(0.003)  | 0.076 |
| 25 | rs7224610 | 17 | 53364788 | HLF    | Genotyped | 1.000 | 0.130 | C/A | 0.0004(0.004)  | 0.902 | -0.001(0.003) | 0.870 |
| 26 | rs2079742 | 17 | 59465697 | BCAS3  | Imputed   | 0.864 | 0.484 | T/C | -0.0002(0.002) | 0.917 | 0.002(0.002)  | 0.374 |
| 27 | rs164009  | 17 | 74283669 | QRICH2 | Genotyped | 1.000 | 0.346 | A/G | 0.002(0.002)   | 0.393 | 0.001(0.002)  | 0.640 |

Model 2 was adjusted for conventional risk factors at baseline, including age, gender, duration of diabetes, smoking, BMI, HbA1c, HDL-C, LDL-C, SBP, DBP, log-transformed ACR, eGFR, retinopathy, use of lipid lowering drugs (yes/no), antihypertensive drugs (yes/no), RAS inhibitors (yes/no), and antihyperglycemic drugs (yes/no), history of stroke, history of CHD, and history of CKD.

Table S2 Clinical characteristics of patients with T2D from the replication cohort of HKDB

|                              | AKI Cases    | AKI Controls | P      |
|------------------------------|--------------|--------------|--------|
| N                            | 1233         | 2643         |        |
| Age (year)                   | 63.7 ± 11.3  | 63.2 ± 9.5   | 0.189  |
| Male sex                     | 60.2% (742)  | 58.9% (1556) | 0.441  |
| Duration of diabetes (year)  | 12 (5-18)    | 15 (11-20)   | <0.001 |
| Smoking status               |              |              | 0.103  |
| Former                       | 24.6% (303)  | 21.9% (577)  |        |
| Current                      | 10.2% (126)  | 9.5% (252)   |        |
| BMI (kg/m <sup>2</sup> )     | 26.5 ± 4.7   | 25.9 ± 4.3   | 0.001  |
| HbA <sub>1c</sub> (%)        | 7.8 ± 1.6    | 7.8 ± 1.3    | 0.927  |
| HbA <sub>1c</sub> (mmol/mol) | 62 ± 17.5    | 62 ± 14.2    | 0.927  |
| HDL cholesterol (mmol/L)     | 1.2 ± 0.4    | 1.2 ± 0.3    | 0.022  |
| LDL cholesterol (mmol/L)     | 2.4 ± 0.9    | 2.3 ± 0.7    | 0.043  |
| Systolic BP (mmHg)           | 137.9 ± 19.5 | 135.5 ± 17.2 | <0.001 |
| Diastolic BP (mmHg)          | 74.6 ± 11.6  | 73.9 ± 10.8  | 0.097  |
| ACR (mg/mmol)                | 7.2 (2-44)   | 2.7 (1-10.7) | <0.001 |
| Retinopathy                  | 36.3% (350)  | 29.9% (602)  | <0.001 |
| Lipid lowering drugs         | 70.8% (862)  | 76.4% (1985) | <0.001 |
| SUA (mmol/L)                 | 0.41 ± 0.11  | 0.37 ± 0.09  | <0.001 |

AKI controls were defined as no AKI at least for 10 years of duration of diabetes.

Table S 3 Association of SUA with clinical outcomes in the discovery cohort of HKDR with or without adjustment for AKI.

|                         | Model 1<br>(adjustment with exclusion of AKI) |        | Model 2<br>(adjustment with inclusion of AKI) |        |
|-------------------------|-----------------------------------------------|--------|-----------------------------------------------|--------|
|                         | HR (95% CI)                                   | P      | HR (95% CI)                                   | P      |
| Chronic kidney disease  | 4.13 (2.9-5.89)                               | <0.001 | 3.34 (2.05-5.43)                              | <0.001 |
| End-stage renal disease | 12.96 (8.11-20.7)                             | <0.001 | 7.3 (4.49-11.86)                              | <0.001 |
| All-cause death         | 2.48 (1.6-3.82)                               | <0.001 | 1.36 (0.87-2.1)                               | 0.174  |

Model 1 was adjusted for conventional risk factors, including age, gender, duration of diabetes, smoking, BMI, HbA1c, HDL-C, LDL-C, SBP, DBP, log-transformed ACR, eGFR, retinopathy, use of lipid lowering drugs (yes/no), antihypertensive drugs (yes/no), RAS inhibitors (yes/no), and antihyperglycemic drugs (yes/no), history of stroke, history of CHD, and/or history of CKD. Model 2 was adjusted for conventional risk factors in addition to AKI, which was used as time-dependent covariates in the Cox models.

Table S4 Association of PRS with clinical outcomes in the replication cohort of HKDB

|                                                      | Model 1<br>(non-adjustment) |       | Model 2<br>(adjustment) |              |
|------------------------------------------------------|-----------------------------|-------|-------------------------|--------------|
|                                                      | OR                          | P     | OR                      | P            |
| <b>AKI (1233 cases vs. 2643 controls)</b>            |                             |       |                         |              |
| PRS (per SD; #SNP=27)                                | 1.04 (0.97-1.11)            | 0.294 | <b>1.14 (1.04-1.25)</b> | <b>0.007</b> |
| Tertile 1                                            | Ref.                        | /     | Ref.                    | /            |
| Tertile 2                                            | 1.09 (0.91-1.29)            | 0.36  | 1.26 (0.99-1.6)         | 0.065        |
| Tertile 3                                            | 1.22 (0.99-1.51)            | 0.057 | <b>1.57 (1.18-2.1)</b>  | <b>0.002</b> |
| <b>CKD (1975 cases vs. 1996 controls)</b>            |                             |       |                         |              |
| PRS (per SD; #SNP=27)                                | 1.05 (0.99-1.12)            | 0.12  | <b>1.15 (1.05-1.27)</b> | <b>0.004</b> |
| Tertile 1                                            | Ref.                        | /     | Ref.                    | /            |
| Tertile 2                                            | 1.15 (0.98-1.35)            | 0.078 | <b>1.43 (1.12-1.83)</b> | <b>0.004</b> |
| Tertile 3                                            | 1.22 (1.01-1.48)            | 0.041 | <b>1.58 (1.17-2.14)</b> | <b>0.003</b> |
| <b>ESRD (219 cases vs. 3286 controls)</b>            |                             |       |                         |              |
| PRS (per SD; #SNP=27)                                | 0.98 (0.85-1.12)            | 0.728 | 1.02 (0.83-1.24)        | 0.886        |
| Tertile 1                                            | Ref.                        | /     | Ref.                    | /            |
| Tertile 2                                            | 0.94 (0.66-1.33)            | 0.709 | 1.01 (0.6-1.71)         | 0.975        |
| Tertile 3                                            | 1.06 (0.7-1.6)              | 0.779 | 1.15 (0.61-2.16)        | 0.666        |
| <b>All-cause death (138 cases vs. 5869 controls)</b> |                             |       |                         |              |
| PRS (per SD; #SNP=27)                                | 0.96 (0.81-1.13)            | 0.597 | 0.91 (0.72-1.15)        | 0.428        |
| Tertile 1                                            | Ref.                        | /     | Ref.                    | /            |
| Tertile 2                                            | 1.03 (0.66-1.6)             | 0.892 | 0.79 (0.45-1.41)        | 0.431        |
| Tertile 3                                            | 1.16 (0.69-1.94)            | 0.583 | 1.09 (0.56-2.14)        | 0.791        |

Model 2 was adjusted for conventional risk factors, including age, gender, duration of diabetes, smoking, BMI, HbA1c, HDL-C, LDL-C, SBP, DBP, log-transformed ACR, retinopathy, use of lipid lowering drugs (yes/no).

Table S5 Associations of AKI (yes/no), the status of AKI severity and recovery with clinical outcomes from the updated definitions.

|              |                   | Chronic kidney disease |        | End-stage renal disease |        | All-cause death  |        |
|--------------|-------------------|------------------------|--------|-------------------------|--------|------------------|--------|
|              |                   | HR (95% CI)            | P      | HR (95% CI)             | P      | HR (95% CI)      | P      |
| AKI (yes/no) |                   | 1.9 (1.63-2.21)        | <0.001 | 3.41 (2.96-3.93)        | <0.001 | 5.56 (5.07-6.09) | <0.001 |
| AKI Severity | No AKI            | Ref.                   | /      | Ref.                    | /      | Ref.             | /      |
|              | Stage 1           | 1.46 (0.92-2.32)       | <0.001 | 1.65 (1.02-2.68)        | <0.001 | 5.09 (4.62-5.6)  | <0.001 |
|              | Stage 2           | 1.91 (1.62-2.27)       | <0.001 | 3.42 (2.94-3.97)        | <0.001 | 6.32 (5.19-7.7)  | <0.001 |
|              | Stage 3           | 2.16 (1.53-3.06)       | <0.001 | 4.34 (3.35-5.62)        | 0.041  | 7.84 (6.81-9.02) | <0.001 |
| AKI Recovery | No AKI            | Ref.                   | /      | Ref.                    | /      | Ref.             | /      |
|              | Complete recovery | 1.53 (1.08-2.17)       | <0.001 | 2.42 (1.85-3.17)        | <0.001 | 4.67 (4.16-5.25) | <0.001 |
|              | Partial recovery  | 1.66 (1.30-2.11)       | <0.001 | 2.58 (2.11-3.15)        | <0.001 | 5.61 (4.83-6.51) | <0.001 |
|              | Non-recovery      | 2.71 (1.85-3.98)       | <0.001 | 4.58 (3.38-6.2)         | <0.001 | 8.15 (6.96-9.54) | <0.001 |

Chronic kidney disease (CKD) and end-stage renal disease (ESRD) were defined by excluding AKI and using eGFR which remained low over 3 months (eGFR <60 mL/min/1.73 m<sup>2</sup> and eGFR <15 mL/min/1.73 m<sup>2</sup> for CKD and ESRD, respectively), in addition to diagnostic codes as described in the primary analysis. The censor date was extended to June 30<sup>th</sup>, 2019. AKI, AKI severity and AKI recovery were used as time-dependent covariates in the Cox models, HRs and p-values were adjusted for conventional risk factors at baseline, including age, gender, duration of diabetes, smoking, SUA, BMI, HbA1c, HDL-C,

LDL-C, SBP, DBP, log-transformed ACR, eGFR, retinopathy, use of lipid lowering drugs, antihypertensive drugs, RAS inhibitors, and antihyperglycemic drugs, history of stroke, history of CHD, and/or history of CKD.

Table S6 Association of SUA with clinical outcomes in males and females in the discovery cohort of HKDR.

|                         | Male                |        | Female            |        |
|-------------------------|---------------------|--------|-------------------|--------|
|                         | HR (95% CI)         | P      | HR (95% CI)       | P      |
| AKI                     | 2.53 (1.38-4.65)    | 0.003  | 4.81 (2.7-8.59)   | <0.001 |
| Chronic kidney disease  | 4.30 (2.50-7.40)    | <0.001 | 4.09 (2.51-6.66)  | <0.001 |
| End-stage renal disease | 21.91 (10.66-45.02) | <0.001 | 7.61 (3.96-14.63) | <0.001 |
| All-cause death         | 2.19 (1.19-4.05)    | <0.001 | 2.77 (1.48-5.17)  | 0.001  |

Adjustment for age, duration of diabetes, smoking, BMI, HbA1c, HDL-C, LDL-C, SBP, DBP, log-transformed ACR, eGFR, retinopathy, use of lipid lowering drugs (yes/no), antihypertensive drugs (yes/no), RAS inhibitors (yes/no), antihyperglycemic drugs (yes/no), history of stroke, history of CHD, and/or history of CKD.



Table S7 Association of hyperuricemia with clinical outcomes in male, female and all patients in the discovery cohort of HKDR.

|                         | Male             |        | Female           |        | All              |        |
|-------------------------|------------------|--------|------------------|--------|------------------|--------|
|                         | HR (95% CI)      | P      | HR (95% CI)      | P      | HR (95% CI)      | P      |
| AKI                     | 1.18 (1.04-1.35) | 0.013  | 1.34 (1.19-1.52) | <0.001 | 1.28 (1.17-1.4)  | <0.001 |
| Chronic kidney disease  | 1.37 (1.22-1.54) | <0.001 | 1.53 (1.37-1.71) | <0.001 | 1.46 (1.35-1.59) | <0.001 |
| End-stage renal disease | 1.86 (1.56-2.21) | <0.001 | 1.44 (1.21-1.71) | <0.001 | 1.67 (1.48-1.89) | <0.001 |
| All-cause death         | 1.19 (1.03-1.37) | 0.017  | 1.04 (0.9-1.21)  | 0.589  | 1.12 (1.02-1.24) | 0.024  |

<sup>a</sup>Hyperuricemia was defined as SUA >0.42 mmol/L in male and >0.36 mmol/L in female according to the National Kidney Foundation.

<sup>b</sup>Adjustment for age, duration of diabetes, smoking, BMI, HbA1c, HDL-C, LDL-C, SBP, DBP, log-transformed ACR, eGFR, retinopathy, use of lipid lowering drugs (yes/no), antihypertensive drugs (yes/no), RAS inhibitors (yes/no), antihyperglycemic drugs (yes/no), history of stroke, history of CHD, and/or history of CKD.

*Supplementary Table S8. Associations of AKI (yes/no), the status of AKI severity and recovery with CKD and ESRD with all-cause mortality as a competing risk.*

|              |                   | Chronic kidney disease |        | End-stage renal disease |        |
|--------------|-------------------|------------------------|--------|-------------------------|--------|
|              |                   | HR (95% CI)            | P      | HR (95% CI)             | P      |
| AKI (yes/no) |                   | 11.2 (9.91-12.66)      | <0.001 | 11.65 (10.31-13.16)     | <0.001 |
| AKI Severity | No AKI            | Ref.                   | /      | Ref.                    | /      |
|              | Stage 1           | 8.68 (7.54-9.99)       | <0.001 | 9.21 (8.09-10.49)       | <0.001 |
|              | Stage 2           | 22.93 (17.87-29.42)    | <0.001 | 18.33 (15.24-22.05)     | <0.001 |
|              | Stage 3           | 53.11 (39.01-72.31)    | <0.001 | 51.07 (41.22-63.27)     | <0.001 |
| AKI Recovery | No AKI            | Ref.                   | /      | Ref.                    | /      |
|              | Complete recovery | 13.01 (10.66-15.88)    | <0.001 | 6.26 (5.3-7.39)         | <0.001 |
|              | Partial recovery  | 8.69 (6.56-11.51)      | <0.001 | 8.42 (6.9-10.29)        | <0.001 |
|              | Non-recovery      | 20.53 (15.54-27.12)    | <0.001 | 20.36 (16.83-24.63)     | <0.001 |

All-cause mortality was considered as a competing risk in Fine-Gray subdistribution hazards model. HRs and p-values were adjusted for conventional risk factors at baseline, including age, gender, duration of diabetes, smoking, SUA, BMI, HbA1c, HDL-C, LDL-C, SBP, DBP, log-transformed ACR, eGFR, retinopathy, use of lipid lowering drugs, antihypertensive drugs, RAS inhibitors, and antihyperglycemic drugs, history of stroke, history of CHD, and/or history of CKD.



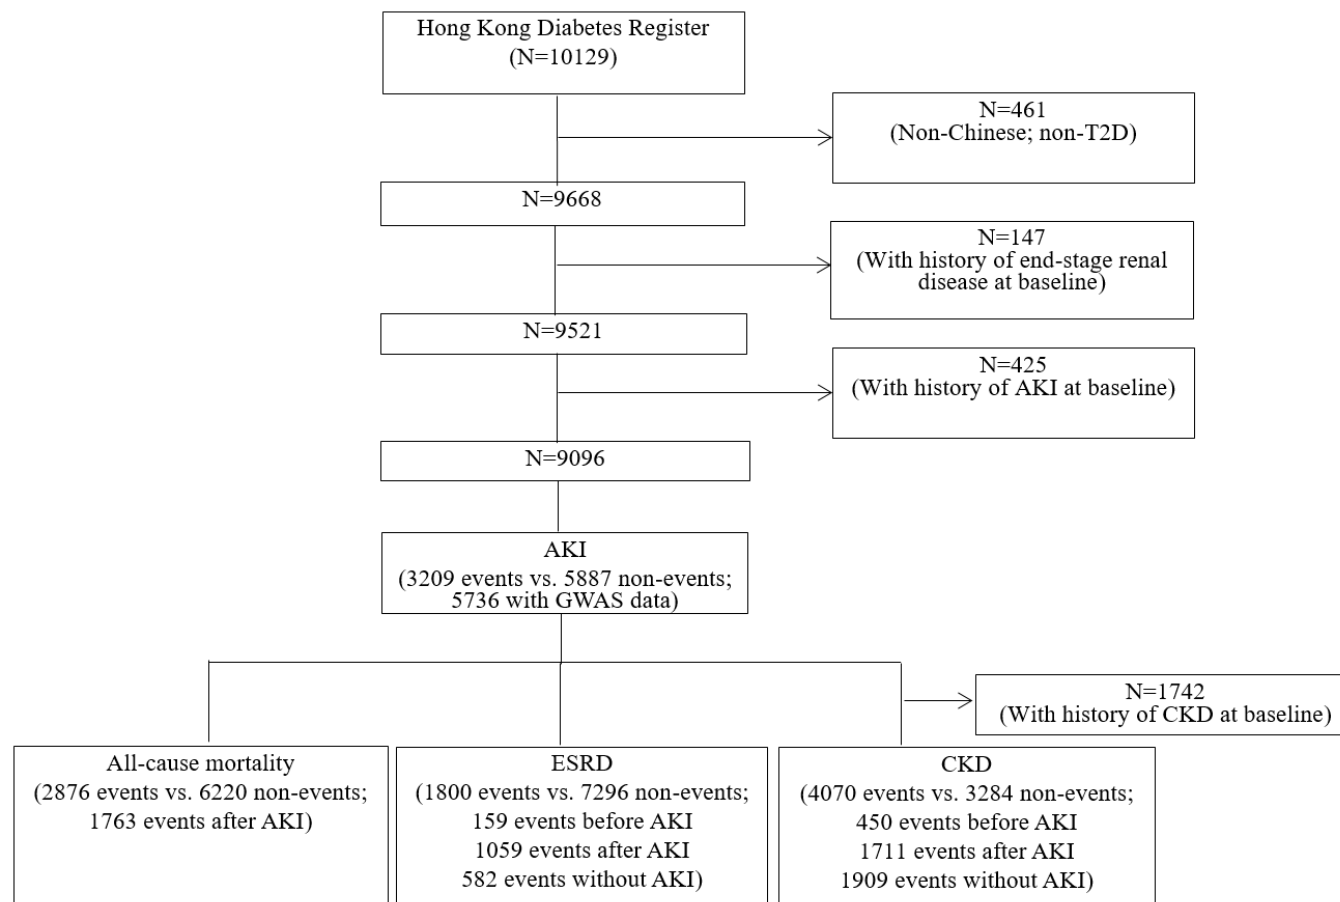

Figure S1 Sample selection from the discovery cohort of Hong Kong Diabetes Register (HKDR).

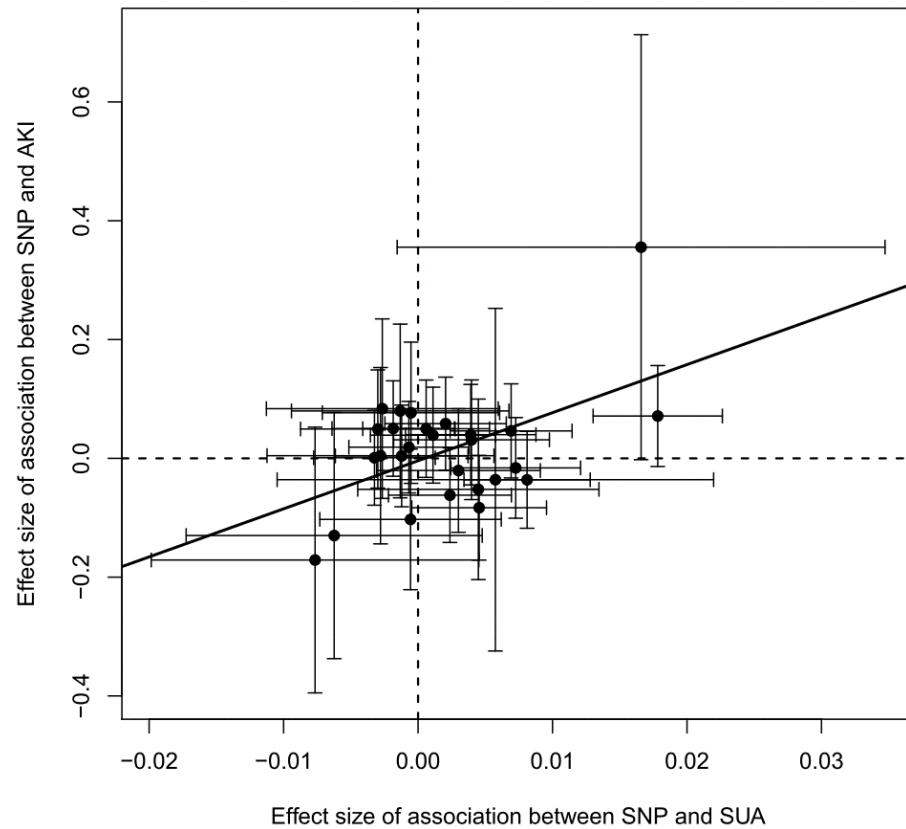

Figure S2 Relationship of association effect sizes of SUA-related SNPs between SUA and AKI in the discovery cohort of HKDR. Linear regression was used to model the relationship between effect sizes for SUA and AKI (solid line). Each point represents the per allele associations of a SNP (lines from each point are 95% confidence intervals for the associations). Effect sizes were obtained from linear model for SUA and Cox model for AKI with adjustment for potential confounders.

Supplementary text

## **Appendix S1. Hong Kong Diabetes Register TRS Study Group Members**

Ronald C.W. Ma<sup>1,2,3,4</sup>

Juliana C.N. Chan<sup>1,2,3</sup>

Yu Huang<sup>5</sup>

Hui-yao Lan<sup>1, 3</sup>

Si Lok<sup>3</sup>

Brian Tomlinson<sup>1</sup>

Stephen K.W. Tsui<sup>5</sup>

Weichuan Yu<sup>6</sup>

Kevin Y.L. Yip<sup>7</sup>

Ting Fung Chan<sup>8</sup>

Xiaodan Fan<sup>9</sup>

Wing Yee So<sup>1,2</sup>

Cheuk Chun Szeto<sup>1</sup>

Nelson L.S. Tang<sup>3</sup>

Andrea O. Luk<sup>1,2,3</sup>

Xiaoyu Tian<sup>5</sup>

Guozhi Jiang<sup>1</sup>

Claudia H.T. Tam<sup>1</sup>

Heung Man Lee<sup>1</sup>

Cadmon K.P. Lim<sup>1</sup>

Katie K.H. Chan<sup>2</sup>

Fangying Xie<sup>1</sup>

Alex C.W. Ng<sup>1</sup>

Grace P.Y. Cheung<sup>1</sup>

Ming-wai Yeung<sup>1</sup>

Shi Mai<sup>5</sup>

Fei Xie<sup>1</sup>

Sen Zhang<sup>6</sup>

Pu Yu<sup>6</sup>

Meng Weng<sup>6</sup>

---

**Affiliations**

---

<sup>1</sup>Department of Medicine and Therapeutics, The Chinese University of Hong Kong, Hong Kong

<sup>2</sup>Hong Kong Institute of Diabetes and Obesity, The Chinese University of Hong Kong, Hong Kong

<sup>3</sup>Li Ka Shing Institute of Health Sciences, The Chinese University of Hong Kong, Hong Kong

<sup>4</sup>Integrated Bioinformatics Laboratory for Cancer Biology and Metabolic Diseases, The Chinese University of Hong Kong, Hong Kong

<sup>5</sup>School of Biomedical Sciences, The Chinese University of Hong Kong

<sup>6</sup>Department of Electronic and Computer Engineering, The Hong Kong University of Science and Technology

<sup>7</sup> Department of Computer Science and Engineering, The Chinese University of Hong Kong

<sup>8</sup> School of Life Sciences, The Chinese University of Hong Kong

<sup>9</sup> Department of Statistics, The Chinese University of Hong Kong, Hong Kong



## **Appendix S2. Hong Kong Diabetes Biobank Study Group Members**

Ronald C.W. Ma <sup>1,2,3,4</sup>

Juliana C.N. Chan <sup>1,2,3,4</sup>

Risa Ozaki<sup>1,2</sup>

Andrea O. Luk<sup>1,2,3,4</sup>

Wing Yee So<sup>1,2</sup>

Ka Fai Lee<sup>5</sup>

Shing Chung Siu<sup>6</sup>

Grace Hui <sup>7</sup>

Chiu Chi Tsang <sup>8</sup>

Kam-piu Lau <sup>9</sup>

Jenny Y.Y. Leung <sup>10</sup>

Man-wo Tsang<sup>11</sup>

Grace Kam<sup>11</sup>

Elaine Cheung<sup>11</sup>

Ip Tim Lau<sup>12</sup>

June Kam-yin Li<sup>13</sup>

Vincent TF Yeung<sup>14</sup>

Samuel Fung<sup>15</sup>

Stanley Lo<sup>16</sup>

Emmy Lau<sup>16</sup>

Yuk-lun Cheng<sup>17</sup>

Stephen Kwok-wing Tsui<sup>18</sup>

Yu Huang<sup>18</sup>

Hui-yao Lan<sup>1,3</sup>

Weichuan Yu<sup>19</sup>

Brian Tomlinson<sup>1</sup>

Si Lok<sup>20</sup>

Ting Fung Chan<sup>21</sup>

Kevin Yuk-lap Yip<sup>22</sup>

Cheuk Chun Szeto<sup>1,3</sup>

Xiaodan Fan<sup>23</sup>

Nelson LS Tang<sup>3, 24</sup>

Xiaoyu Tian<sup>18</sup>

Claudia H.T. Tam<sup>1,4</sup>

Guozhi Jiang<sup>1,4</sup>

Shi Mai<sup>18</sup>

Baoqi Fan<sup>1,2,4</sup>

Fei Xie<sup>1</sup>

Sen Zhang<sup>19</sup>

Pu Yu<sup>19</sup>

Meng Wang<sup>19</sup>

Heung Man Lee<sup>1</sup>

Cadmon King Poo Lim <sup>1,3</sup>

Fangying Xie<sup>1</sup>

Alex C.W. Ng<sup>1,4</sup>

Grace Cheung<sup>1</sup>

Alice PS Kong<sup>1,2</sup>

Elaine Y.K. Chow<sup>1,2</sup>

Ming Wai Yeung<sup>1</sup>

Chun Chung Chow<sup>1</sup>

Kitty K.T. Cheung<sup>1</sup>

Rebecca Y.M. Wong<sup>1</sup>

So Hon Cheong<sup>18</sup>

Katie KH Chan<sup>1,2</sup>

Chin-san Law<sup>12</sup>

Anthea Ka Yuen Lock<sup>12</sup>

Ingrid Kwok Ying Tsang<sup>12</sup>

Susanna Chi Pun Chan<sup>12</sup>

Yin Wah Chan<sup>12</sup>

Cherry Chiu<sup>2</sup>

Chi Sang Hung<sup>11</sup>

Cheuk Wah Ho<sup>11</sup>

Ivy Hoi Yee Ng<sup>11</sup>

Juliana Mun Chun Fok<sup>6</sup>

Kai Man Lee<sup>6</sup>

Hoi Sze Candy Leung<sup>14</sup>

Ka Wah Lee<sup>13</sup>

Hui Ming Chan<sup>13</sup>

Winnie Wat<sup>16</sup>

Tracy Lau<sup>16</sup>

Rebecca Law<sup>15</sup>

Ryan Chan<sup>15</sup>

Candice Lau<sup>1</sup>

Pearl Tsang<sup>1</sup>

Vince Chan<sup>1</sup>

Lap Ying Ho<sup>1</sup>

Eva Wong<sup>1</sup>

Josephine Chan<sup>1</sup>

Sau Fung Lam<sup>1</sup>

Jessy Pang<sup>1</sup>

Yee Mui Lee<sup>1</sup>

<sup>1</sup> Department of Medicine and Therapeutics, The Chinese University of Hong Kong

<sup>2</sup> Hong Kong Institute of Diabetes and Obesity, The Chinese University of Hong Kong

<sup>3</sup> Li Ka Shing Institute of Health Sciences, The Chinese University of Hong Kong

<sup>4</sup> Chinese University of Hong Kong-Shanghai Jiao Tong University Joint Research Centre in Diabetes Genomics and Precision Medicine

<sup>5</sup> School of Biomedical Sciences, The Chinese University of Hong Kong

<sup>5</sup> Department of Electronic and Computer Engineering, Hong Kong University of Science and Technology

<sup>6</sup> Department of Medicine and Geriatrics, Kwong Wah Hospital

<sup>7</sup> Diabetes Centre, Tung Wah Eastern Hospital, Hong Kong

<sup>8</sup> Diabetes and Education Centre, Alice Ho Miu Ling Nethersole Hospital, Hong Kong

<sup>9</sup> North District Hospital, Hong Kong

<sup>10</sup> Department of Integrated Medical Service, Ruttonjee Hospital, Hong Kong

<sup>11</sup> Diabetes Ambulatory Care Centre, Department of Medicine and Geriatrics, United Christian Hospital

<sup>12</sup> Tseung Kwan O Hospital, Hong Kong

<sup>13</sup> Department of Medicine, Yan Chai Hospital, Hong Kong

<sup>14</sup> Centre for Diabetes Education and Management, Our Lady of Maryknoll Hospital, Hong Kong

<sup>15</sup> Department of Medicine and Geriatrics, Princess Margaret Hospital, Hong Kong

<sup>16</sup> Department of Medicine, Pamela Youde Hospital Nethersole Eastern Hospital, Hong Kong.

<sup>17</sup> Department of Medicine, Alice Ho Miu Ling Nethersole Hospital, Hong Kong

<sup>18</sup> The Centre for Applied Genomics, The Hospital for Sick Children, Toronto, Canada

<sup>19</sup> School of Life Sciences, The Chinese University of Hong Kong

<sup>20</sup> Department of Computer Science and Engineering, The Chinese University of Hong Kong

<sup>21</sup> Department of Statistics, The Chinese University of Hong Kong



<sup>22</sup>Department of Chemical Pathology, The Chinese University of Hong Kong

<sup>23</sup>CUHK-SJTU Joint Research Centre on Diabetes Genomics and Precision Medicine

<sup>24</sup>Integrated Bioinformatics Laboratory for Cancer and Metabolic Diseases, The Chinese

University of Hong Kong
